# Supplementary material for: Repeated exposure to nanosecond high power pulsed microwaves increases cancer incidence in rat
Source: PubMed Central journal article supplement (PMC7141660; doi:10.1371/journal.pone.0226858), 2020-04-08
Supplement: pone.0226858.s002.pdf [file pone.0226858.s002.pdf]

19 et 20  
dec 06

|      | Animal # | Training |         |         | Test                    |         |         | Cible | Training |         |         | Test                  |         |         |
|------|----------|----------|---------|---------|-------------------------|---------|---------|-------|----------|---------|---------|-----------------------|---------|---------|
|      |          | Trial 1  | Trial 2 | Trial 3 | Trial 1                 | Trial 2 | Trial 3 |       | Trial 1  | Trial 2 | Trial 3 | Trial 1               | Trial 2 | Trial 3 |
| Sham | 25       | 2        | 17      | 7       | 6                       | 60      | 60      | 1     | 11       | 60      | 60      | 7                     | 60      | 60      |
|      | 26       | 4        | 31      | 12      | 7                       | 8       | 10      | 2     | 22       | 13      | 60      | 60                    | 46      | 60      |
|      | 27       | 8        | 2       | 10      | 59                      | 60      | 60      | 3     | 1        | 22      | 20      | 14                    | 60      | 60      |
|      | 28       | 18       | 20      | 2       | 46                      | 60      | 60      | 4     | 1        | 10      | 1       | 11                    | 27      | 7       |
|      | 29       | 5        | 14      | 4       | 13                      | 4       | 44      | 5     | 1        | 60      | 24      | 60                    | 60      | 60      |
|      | 30       | 10       | 60      | 60      | 10                      | 60      | 60      | 6     | 22       | 20      | 60      | 60                    | 60      | 60      |
|      | 31       | 11       | 7       | 8       | 10                      | 60      | 60      | 7     | 2        | 60      | 60      | 60                    | 14      | 60      |
|      | 32       | 3        | 8       | 39      | 13                      | 26      | 13      | 8     | 2        | 60      | 60      | 60                    | 60      | 60      |
|      | 33       | 4        | 5       | 6       | 32                      | 60      | 60      | 9     | 3        | 60      | 60      | 60                    | 60      | 60      |
|      | 34       | 8        | 3       | 10      | 1                       | 15      | 4       | 10    | 2        | 24      | 17      | 60                    | 60      | 60      |
|      | 35       | 33       | 12      | 30      | 25                      | 17      | 7       | 11    | 21       | 60      | 60      | 27                    | 60      | 60      |
|      | 36       | 2        | 4       | 10      | 2                       | 9       | 60      | 12    | 31       | 60      | 60      | 34                    | 60      | 60      |
|      | 37       | 9        | 3       | 11      | 45                      | 17      | 5       | 13    | 8        | 28      | 45      | 45                    | 60      | 60      |
|      | 38       | 36       | 11      | 10      | 8                       | 60      | 60      | 14    | 6        | 60      | 26      | 30                    | 60      | 60      |
|      | 39       | 33       | 2       | 37      | 40                      | 31      | 26      | 15    | 1        | 57      | 44      | 60                    | 60      | 60      |
|      | 40       | 48       | 3       | 60      | 10                      | 60      | 60      | 16    | 2        | 33      | 22      | 48                    | 60      | 60      |
|      | 41       | 12       | 8       | 30      | 27                      | 26      | 60      | 17    | 1        | 30      | 33      | don't stay on the rod |         |         |
|      | 42       | 19       | 10      | 8       | 7                       | 3       | 4       | 18    | 1        | 10      | 27      | don't stay on the rod |         |         |
|      | 43       | 3        | 27      | 15      | 19                      | 20      | 17      | 19    | 8        | 42      | 60      | 14                    | 60      | 60      |
|      | 44       | 1        | 41      | 31      | 47                      | 60      | 60      | 20    | 6        | 60      | 60      | 55                    | 60      | 37      |
| 45   | 60       | 60       | 60      | 60      | 60                      | 60      | 21      | 20    | 16       | 15      | 8       | 34                    | 2       |         |
| 46   | 14       | 9        | 11      | 9       | 6                       | 16      | 22      | 8     | 11       | 6       | 6       | 15                    | 7       |         |
| 47   | 20       | 10       | 4       | 7       | doesn't stay on the rod |         | 23      | 1     | 33       | 15      | 9       | 37                    | 35      |         |
| 48   | 1        | 60       | 37      | 14      | 12                      | 24      | 24      | 1     | 60       | 60      | 21      | 60                    | 60      |         |

|    |          |         |         |          |    |
|----|----------|---------|---------|----------|----|
|    | Training |         | Test    |          |    |
|    | failure  | success | failure | success  |    |
| Ex | 65       | 7       | Ex      | 49       | 23 |
| Te | 49       | 23      | Te      | 31       | 41 |
|    | p        | 2,0E-10 | p       | 0,000005 |    |
