# Supplementary material for: Repeated exposure to nanosecond high power pulsed microwaves increases cancer incidence in rat
Source: PubMed Central journal article supplement (PMC7141660; doi:10.1371/journal.pone.0226858), 2020-04-08
Supplement: pone.0226858.s003.pdf [file pone.0226858.s003.pdf]

Avoidance test source 2

|         |    | Time spent in non-shielded side over 300s | Time spent in non-shielded side over 900s | % time spent in non-shielded side |                 | Start hab | Start exp |
|---------|----|-------------------------------------------|-------------------------------------------|-----------------------------------|-----------------|-----------|-----------|
|         |    | 5 min habituation                         | 15 min exposure                           | 5 min habituation                 | 15 min exposure |           |           |
| Sham    | 1  | 180                                       | 215                                       | 60                                | 23,9            | NS        | NS        |
|         | 2  | 180                                       | 330                                       | 60                                | 36,6            | NS        | NS        |
|         | 3  | 180                                       | 180                                       | 60                                | 20              | S         | S         |
|         | 4  | 111                                       | 280                                       | 37                                | 31,1            | S         | S         |
|         | 5  | 180                                       | 153                                       | 60                                | 17              | NS        | S         |
|         | 6  | 168                                       | 40                                        | 56                                | 4,4             | S         | NS        |
|         | 7  | 129                                       | 315                                       | 43                                | 35              | NS        | S         |
|         | 8  | 129                                       | 130                                       | 43                                | 14,4            | S         | S         |
|         | 9  | 150                                       | 156                                       | 50                                | 17,3            | NS        | S         |
|         | 10 | 159                                       | 190                                       | 53                                | 21,1            | S         | NS        |
|         | 11 | 129                                       | 220                                       | 43                                | 24,4            | NS        | NS        |
|         | 12 | 129                                       | 160                                       | 43                                | 17,7            | S         | S         |
| Av      |    | <b>152,0</b>                              | <b>197,4</b>                              | <b>50,7</b>                       | <b>21,9</b>     |           |           |
| SD      |    | <b>25,7</b>                               | <b>81,9</b>                               | <b>8,6</b>                        | <b>9,1</b>      |           |           |
| Exposed | 1  | 30                                        | 5                                         | 10                                | 0,56            | NS        | S         |
|         | 2  | 129                                       | 52                                        | 43                                | 5,7             | NS        | S         |
|         | 3  | 168                                       | 95                                        | 56                                | 10,5            | NS        | NS        |
|         | 4  | 129                                       | 62                                        | 43                                | 6,8             | NS        | S         |
|         | 5  | 39                                        | 7                                         | 13                                | 0,8             | NS        | S         |
|         | 6  | 138                                       | 18                                        | 46                                | 2               | NS        | S         |
|         | 7  | 123                                       | 18                                        | 41                                | 2               | NS        | NS        |
|         | 8  | 138                                       | 21                                        | 46                                | 2,3             | NS        | NS        |
|         | 9  | 138                                       | 14                                        | 46                                | 1,6             | NS        | NS        |
|         | 10 | 165                                       | 15                                        | 55                                | 1,7             | NS        | S         |
|         | 11 | 141                                       | 84                                        | 47                                | 9,3             | NS        | NS        |
|         | 12 | 129                                       | 8                                         | 43                                | 0,9             | NS        | NS        |
| Av      |    | <b>122,3</b>                              | <b>33,3</b>                               | <b>40,8</b>                       | <b>3,7</b>      |           |           |
| SD      |    | <b>43,3</b>                               | <b>31,6</b>                               | <b>14,4</b>                       | <b>3,5</b>      |           |           |

NS: start in non-shielded side

S: start in shielded side
