# Supplementary material for: Repeated exposure to nanosecond high power pulsed microwaves increases cancer incidence in rat
Source: PubMed Central journal article supplement (PMC7141660; doi:10.1371/journal.pone.0226858), 2020-04-08
Supplement: pone.0226858.s004.pdf [file pone.0226858.s004.pdf]

| Nom de l'image | Calibration | DO min | DO max | Surface  | Surface marquée | Ratio | Nombre | rat   | groupe | région |    |    |     |     |
|----------------|-------------|--------|--------|----------|-----------------|-------|--------|-------|--------|--------|----|----|-----|-----|
| FC_01-03-1     | Objectif_10 | 0      | 104    | 143822,1 | 11291,15        | 0,08  | 28727  | rat1  | gp3    | s1     | 1  | 3  | FC  |     |
| DG_01-03-1     | Objectif_10 | 0      | 132    | 21861,05 | 424,1           | 0,02  | 1079   | rat1  | gp3    | s1     | 1  | 3  | DG  |     |
| CCx_01-03-1    | Objectif_10 | 0      | 64     | 35339,13 | 8768,56         | 0,25  | 22309  | rat1  | gp3    | s1     | 1  | 3  | CCx |     |
| CF-02-03-1     | Objectif_10 | 0      | 111    | 69911,42 | 6613,85         | 0,09  | 16827  | rat2  | gp3    | s1     | 2  | 3  | CF  |     |
| Cpu_02-03-1    | Objectif_10 | 0      | 111    | 144419,6 | 8276,06         | 0,06  | 21056  | rat2  | gp3    | s1     | 2  | 3  | Cpu |     |
| LGP_02-03-1    | Objectif_10 | 0      | 90     | 76930,12 | 10559,68        | 0,14  | 26866  | rat2  | gp3    | s1     | 2  | 3  | LGP |     |
| CF_04-03-1     | Objectif_10 | 0      | 115    | 136203,6 | 19101,05        | 0,14  | 48597  | rat4  | gr3    | s1     | 4  | 3  | CF  |     |
| DG_04-03-1     | Objectif_10 | 0      | 84     | 20607,62 | 2948,27         | 0,14  | 7501   | rat4  | gr3    | s1     | 4  | 3  | DG  |     |
| CPu_04-03-1    | Objectif_10 | 0      | 106    | 151791,2 | 15819,87        | 0,1   | 40249  | rat4  | gr3    | s1     | 4  | 3  | Cpu |     |
| LGP_04-03-1    | Objectif_10 | 0      | 94     | 111162,8 | 21301,35        | 0,19  | 54195  | rat4  | gr3    | s1     | 4  | 3  | LGP |     |
| CCx_04-03-1    | Objectif_10 | 0      | 106    | 34714,57 | 6504,98         | 0,19  | 16550  | rat4  | gr3    | s1     | 4  | 3  | CCx |     |
| CF_05-03-1     | Objectif_10 | 0      | 89     | 158792,6 | 29243,71        | 0,18  | 74402  | rat5  | gr3    | s1     | 5  | 3  | CF  |     |
| DG_05-03-1     | Objectif_10 | 0      | 92     | 19677,66 | 7338,64         | 0,37  | 18671  | rat5  | gr3    | s1     | 5  | 3  | DG  |     |
| CPu_05-03-1    | Objectif_10 | 0      | 130    | 161466,9 | 53679,24        | 0,33  | 136571 | rat5  | gr3    | s1     | 5  | 3  | Cpu |     |
| LGP_05-03-1    | Objectif_10 | 0      | 95     | 70003,01 | 9045,65         | 0,13  | 23014  | rat5  | gr3    | s1     | 5  | 3  | LGP |     |
| CCx_05-03-1    | Objectif_10 | 0      | 181    | 114467,6 | 49461,03        | 0,43  | 125839 | rat5  | gr3    | s1     | 5  | 3  | CCx |     |
| CF_06-03-1     | Objectif_10 | 0      | 140    | 130719   | 28841,23        | 0,22  | 73378  | rat6  | gr3    | s1     | 6  | 3  | CF  |     |
| DG_06-03-1     | Objectif_10 | 0      | 167    | 17971,43 | 5218,92         | 0,29  | 13278  | rat6  | gr3    | s1     | 6  | 3  | DG  |     |
| CPu_06-03-1    | Objectif_10 | 0      | 149    | 135661,2 | 49029,07        | 0,36  | 124740 | rat6  | gr3    | s1     | 6  | 3  | Cpu |     |
| LGP_06-03-1    | Objectif_10 | 0      | 170    | 100394,8 | 15978,27        | 0,16  | 40652  | rat6  | gr3    | s1     | 6  | 3  | LGP |     |
| CCx_06-03-1    | Objectif_10 | 0      | 104    | 90978,91 | 56704,16        | 0,62  | 144267 | rat6  | gr3    | s1     | 6  | 3  | CCx |     |
| CF_07-03-1     | Objectif_10 | 0      | 108    | 142658,7 | 29022,82        | 0,2   | 73840  | rat7  | gr3    | s1     | 7  | 3  | CF  |     |
| DG_07-03-1     | Objectif_10 | 0      | 81     | 20822,61 | 5388,32         | 0,26  | 13709  | rat7  | gr3    | s1     | 7  | 3  | DG  |     |
| CPu_07-03-1    | Objectif_10 | 0      | 90     | 160032,7 | 35704,28        | 0,22  | 90839  | rat7  | gr3    | s1     | 7  | 3  | Cpu |     |
| LGP_07-03-1    | Objectif_10 | 0      | 93     | 66392,05 | 18930,47        | 0,29  | 48163  | rat7  | gr3    | s1     | 7  | 3  | LGP |     |
| CCx_07-03-1    | Objectif_10 | 0      | 193    | 77577,48 | 32936,42        | 0,42  | 83797  | rat7  | gr3    | s1     | 7  | 3  | CCx |     |
| CF_08-03-1     | Objectif_10 | 0      | 142    | 139249,4 | 28593,21        | 0,21  | 72747  | rat8  | gr3    | s1     | 8  | 3  | CF  |     |
| DG_08-03-1     | Objectif_10 | 0      | 82     | 21425,95 | 6513,23         | 0,3   | 16571  | rat8  | gr3    | s1     | 8  | 3  | DG  |     |
| CPu_08-03-1    | Objectif_10 | 0      | 148    | 160084,2 | 31182,23        | 0,19  | 79334  | rat8  | gr3    | s1     | 8  | 3  | Cpu |     |
| LGP_08-03-1    | Objectif_10 | 0      | 110    | 115242,3 | 26495,51        | 0,23  | 67410  | rat8  | gr3    | s1     | 8  | 3  | LGP |     |
| CCx_08-03-1    | Objectif_10 | 0      | 147    | 77604,98 | 47361,75        | 0,61  | 120498 | rat8  | gr3    | s1     | 8  | 3  | CCx |     |
| CF_09-03-1     | Objectif_10 | 0      | 104    | 154885,7 | 24075,1         | 0,16  | 61252  | rat9  | gr3    | s1     | 9  | 3  | CF  |     |
| DG_09-03-1     | Objectif_10 | 0      | 83     | 14558,58 | 4762,59         | 0,33  | 12117  | rat9  | gr3    | s1     | 9  | 3  | DG  |     |
| CPu_09-03-1    | Objectif_10 | 0      | 124    | 160238,7 | 36475,44        | 0,23  | 92801  | rat9  | gr3    | s1     | 9  | 3  | Cpu |     |
| LGP_09-03-1    | Objectif_10 | 0      | 84     | 102809,3 | 26211,72        | 0,25  | 66688  | rat9  | gr3    | s1     | 9  | 3  | LGP |     |
| CCx_09-03-1    | Objectif_10 | 0      | 110    | 108155,6 | 23305,9         | 0,22  | 59295  | rat9  | gr3    | s1     | 9  | 3  | CCx |     |
| CF_10-03-1     | Objectif_10 | 0      | 166    | 164844   | 40984,51        | 0,25  | 104273 | rat10 | gr3    | s1     | 10 | 3  | CF  |     |
| DG_10-03-1     | Objectif_10 | 0      | 96     | 11262,46 | 3458,84         | 0,31  | 8800   | rat10 | gr3    | s1     | 10 | 3  | DG  |     |
| CPu_10-03-1    | Objectif_10 | 0      | 147    | 162076,6 | 52122,77        | 0,32  | 132611 | rat10 | gr3    | s1     | 10 | 3  | Cpu |     |
| LGP_10-03-1    | Objectif_10 | 0      | 82     | 77205,65 | 22677,02        | 0,29  | 57695  | rat10 | gr3    | s1     | 10 | 3  | LGP |     |
| CCx_10-03-1    | Objectif_10 | 0      | 110    | 102830,2 | 47842,05        | 0,47  | 121720 | rat10 | gr3    | s1     | 10 | 3  | CCx |     |
| CF_11-03-1     | Objectif_10 | 0      | 112    | 168468   | 46289,51        | 0,27  | 117770 | rat11 | gr3    | s1     | 11 | 3  | CF  |     |
| DG_11-03-1     | Objectif_10 | 0      | 115    | 22076,05 | 9301,92         | 0,42  | 23666  | rat11 | gr3    | s1     | 11 | 3  | DG  |     |
| CPu_11-03-1    | Objectif_10 | 0      | 160    | 165759,4 | 38530,7         | 0,23  | 98030  | rat11 | gr3    | s1     | 11 | 3  | Cpu |     |
| LGP_11-03-1    | Objectif_10 | 0      | 97     | 53058,62 | 16953,04        | 0,32  | 43132  | rat11 | gr3    | s1     | 11 | 3  | LGP |     |
| CCx_11-03-1    | Objectif_10 | 0      | 93     | 93790,79 | 52156,57        | 0,56  | 132697 | rat11 | gr3    | s1     | 11 | 3  | CCx |     |
| CF_12-03-1     | Objectif_10 | 0      | 74     | 164770,5 | 62195,07        | 0,38  | 158237 | rat12 | gr3    | s1     | 12 | 3  | CF  |     |
| DG_12-03-1     | Objectif_10 | 0      | 40     | 24379,72 | 10161,13        | 0,42  | 25852  | rat12 | gr3    | s1     | 12 | 3  | DG  |     |
| CPu_12-03-1    | Objectif_10 | 0      | 102    | 168833,5 | 32750,5         | 0,19  | 83324  | rat12 | gr3    | s1     | 12 | 3  | Cpu |     |
| LGP_12-03-1    | Objectif_10 | 0      | 95     | 71234,82 | 26311,17        | 0,37  | 66941  | rat12 | gr3    | s1     | 12 | 3  | LGP |     |
| CCx_12-03-1    | Objectif_10 | 0      | 49     | 107290,1 | 40773,05        | 0,38  | 103735 | rat12 | gr3    | s1     | 12 | 3  | CCx |     |
| CF_13-03-1     | Objectif_10 | 0      | 132    | 113291,6 | 31974,62        | 0,28  | 81350  | rat13 | gr3    | s1     | 13 | 3  | CF  |     |
| DG_13-03-1     | Objectif_10 | 0      | 106    | 15212,61 | 6510,88         | 0,43  | 16565  | rat13 | gr3    | s1     | 13 | 3  | DG  |     |
| CPu_13-03-1    | Objectif_10 | 0      | 157    | 152248,7 | 35291,18        | 0,23  | 89788  | rat13 | gr3    | s1     | 13 | 3  | Cpu |     |
| LGP_13-03-1    | Objectif_10 | 0      | 176    | 64141,84 | 15149,72        | 0,24  | 38544  | rat13 | gr3    | s1     | 13 | 3  | LGP |     |
| CCx_13-03-1    | Objectif_10 | 0      | 76     | 107797,5 | 46061,14        | 0,43  | 117189 | rat13 | gr3    | s1     | 13 | 3  | CCx |     |
| CF_14-03-S1    | Objectif_10 | 0      | 110    | 162399,6 | 43189,91        | 0,27  | 109884 | rat   | 14     | gr3    | S1 | 14 | 3   | CF  |
| DG_14-03-S1    | Objectif_10 | 0      | 108    | 13746,93 | 5292,81         | 0,39  | 13466  | rat   | 14     | gr3    | S1 | 14 | 3   | DG  |
| CPu_14-03-S1   | Objectif_10 | 0      | 155    | 126941,8 | 25718,45        | 0,2   | 65433  | rat   | 14     | gr3    | S1 | 14 | 3   | Cpu |
| LGP_14-03-S1   | Objectif_10 | 0      | 161    | 102128,2 | 25188,22        | 0,25  | 64084  | rat   | 14     | gr3    | S1 | 14 | 3   | LGP |
| CCx_14-03-S1   | Objectif_10 | 0      | 132    | 79090,72 | 24517,68        | 0,31  | 62378  | rat   | 14     | gr3    | S1 | 14 | 3   | CCx |
| CF_15-03-S1    | Objectif_10 | 0      | 143    | 156930   | 50303,34        | 0,32  | 127982 | rat   | 15     | gr3    | S1 | 15 | 3   | CF  |
| DG_15-03-S1    | Objectif_10 | 0      | 79     | 27626,7  | 12138,17        | 0,44  | 30882  | rat   | 15     | gr3    | S1 | 15 | 3   | DG  |
| CPu_15-03-S1   | Objectif_10 | 0      | 156    | 117215   | 21366,99        | 0,18  | 54362  | rat   | 15     | gr3    | S1 | 15 | 3   | Cpu |
| LGP_15-03-S1   | Objectif_10 | 0      | 140    | 100364,6 | 29765,29        | 0,3   | 75729  | rat   | 15     | gr3    | S1 | 15 | 3   | LGP |
| CCx_15-03-S1   | Objectif_10 | 0      | 86     | 117664,3 | 63123,05        | 0,54  | 160598 | rat   | 15     | gr3    | S1 | 15 | 3   | CCx |

|             |             |   |     |          |          |      |        |               |    |   |     |
|-------------|-------------|---|-----|----------|----------|------|--------|---------------|----|---|-----|
| CF_16-03-1  | Objectif_10 | 0 | 130 | 129311,1 | 48082,6  | 0,37 | 122332 | rat 16 gr3 S1 | 16 | 3 | CF  |
| DG_16-03-1  | Objectif_10 | 0 | 81  | 16915,7  | 8665,58  | 0,51 | 22047  | rat 16 gr3 S1 | 16 | 3 | DG  |
| CPu_16-03-1 | Objectif_10 | 0 | 146 | 145500,1 | 50345    | 0,35 | 128088 | rat 16 gr3 S1 | 16 | 3 | Cpu |
| LGP_16-03-1 | Objectif_10 | 0 | 123 | 59320,3  | 18452,92 | 0,31 | 46948  | rat 16 gr3 S1 | 16 | 3 | LGP |
| CCx_16-03-1 | Objectif_10 | 0 | 80  | 54209,47 | 31876,36 | 0,59 | 81100  | rat 16 gr3 S1 | 16 | 3 | CCx |
| CF_17-03-1  | Objectif_10 | 0 | 136 | 160448,5 | 38676,52 | 0,24 | 98401  | rat 17 gr3 S1 | 17 | 3 | CF  |
| DG_17-03-1  | Objectif_10 | 0 | 102 | 30090,73 | 13948,17 | 0,46 | 35487  | rat 17 gr3 S1 | 17 | 3 | DG  |
| CPu_17-03-1 | Objectif_10 | 0 | 147 | 116479,2 | 41354,37 | 0,36 | 105214 | rat 17 gr3 S1 | 17 | 3 | Cpu |
| LGP_17-03-1 | Objectif_10 | 0 | 116 | 80597,27 | 28236,32 | 0,35 | 71839  | rat 17 gr3 S1 | 17 | 3 | LGP |
| CCx_17-03-1 | Objectif_10 | 0 | 85  | 167723,5 | 68564,45 | 0,41 | 174442 | rat 17 gr3 S1 | 17 | 3 | CCx |
| CF_18-03-1  | Objectif_10 | 0 | 171 | 169234,8 | 54437,04 | 0,32 | 138499 | rat 18 gr3 S1 | 18 | 3 | CF  |
| DG_18-03-1  | Objectif_10 | 0 | 106 | 30982,96 | 13239,11 | 0,43 | 33683  | rat 18 gr3 S1 | 18 | 3 | DG  |
| CPu_18-03-1 | Objectif_10 | 0 | 171 | 114653,5 | 34279,86 | 0,3  | 87215  | rat 18 gr3 S1 | 18 | 3 | Cpu |
| LGP_18-03-1 | Objectif_10 | 0 | 144 | 71588,18 | 19023,23 | 0,27 | 48399  | rat 18 gr3 S1 | 18 | 3 | LGP |
| CCx_18-03-1 | Objectif_10 | 0 | 115 | 98496,38 | 36993,88 | 0,38 | 94120  | rat 18 gr3 S1 | 18 | 3 | CCx |
| CF_19-03-1  | Objectif_10 | 0 | 49  | 121708,7 | 42915,57 | 0,35 | 109186 | rat19 gr3 S1  | 19 | 3 | CF  |
| DG_19-03-1  | Objectif_10 | 0 | 27  | 36070,99 | 15341,53 | 0,43 | 39032  | rat19 gr3 S1  | 19 | 3 | DG  |
| CPu_19-03-1 | Objectif_10 | 0 | 89  | 97964,98 | 46080,8  | 0,47 | 117239 | rat19 gr3 S1  | 19 | 3 | Cpu |
| LGP_19-03-1 | Objectif_10 | 0 | 29  | 61913,64 | 26608,31 | 0,43 | 67697  | rat19 gr3 S1  | 19 | 3 | LGP |
| CF_20-03-1  | Objectif_10 | 0 | 131 | 136559,4 | 35504,61 | 0,26 | 90331  | rat20 gr3 S1  | 20 | 3 | CF  |
| DG_20-03-1  | Objectif_10 | 0 | 98  | 26118,96 | 10196,11 | 0,39 | 25941  | rat20 gr3 S1  | 20 | 3 | DG  |
| CPu_20-03-1 | Objectif_10 | 0 | 149 | 130210   | 46405,85 | 0,36 | 118066 | rat20 gr3 S1  | 20 | 3 | Cpu |
| LGP_20-03-1 | Objectif_10 | 0 | 126 | 92679,63 | 35272,71 | 0,38 | 89741  | rat20 gr3 S1  | 20 | 3 | LGP |
| CCx_20-03-1 | Objectif_10 | 0 | 120 | 169746,5 | 74483,77 | 0,44 | 189502 | rat20 gr3 S1  | 20 | 3 | CCx |
| CF_21-03-1  | Objectif_10 | 0 | 128 | 151562,5 | 50152,01 | 0,33 | 127597 | rat21 gr3 S1  | 21 | 3 | CF  |
| DG_21-03-1  | Objectif_10 | 0 | 90  | 29005,92 | 13633,73 | 0,47 | 34687  | rat21 gr3 S1  | 21 | 3 | DG  |
| Cpu_21-03-1 | Objectif_10 | 0 | 131 | 110579,1 | 43415,92 | 0,39 | 110459 | rat21 gr3 S1  | 21 | 3 | Cpu |
| LGP_21-03-1 | Objectif_10 | 0 | 91  | 72318,86 | 28465,08 | 0,39 | 72421  | rat21 gr3 S1  | 21 | 3 | LGP |
| CCx_21-03-1 | Objectif_10 | 0 | 76  | 125971,4 | 53805,02 | 0,43 | 136891 | rat21 gr3 S1  | 21 | 3 | CCx |
| CF_22-03-1  | Objectif_10 | 0 | 124 | 169206,9 | 48236,29 | 0,29 | 122723 | rat22 gr3 S1  | 22 | 3 | CF  |
| DG_22-03-1  | Objectif_10 | 0 | 106 | 20711,77 | 7904,63  | 0,38 | 20111  | rat22 gr3 S1  | 22 | 3 | DG  |
| Cpu_22-03-1 | Objectif_10 | 0 | 144 | 133775   | 39669,76 | 0,3  | 100928 | rat22 gr3 S1  | 22 | 3 | Cpu |
| LGP_22-03-1 | Objectif_10 | 0 | 94  | 76680,53 | 23959,94 | 0,31 | 60959  | rat22 gr3 S1  | 22 | 3 | LGP |
| CCx_22-03-1 | Objectif_10 | 0 | 82  | 111951,7 | 63461,08 | 0,57 | 161458 | rat22 gr3 S1  | 22 | 3 | CCx |
| CF_24-03-1  | Objectif_10 | 0 | 112 | 169955,3 | 51712,81 | 0,3  | 131568 | rat24 gr3 S1  | 24 | 3 | CF  |
| DG_24-03-1  | Objectif_10 | 0 | 81  | 22276,51 | 11346,18 | 0,51 | 28867  | rat24 gr3 S1  | 24 | 3 | DG  |
| CPu_24-03-1 | Objectif_10 | 0 | 135 | 105671,9 | 30036,49 | 0,28 | 76419  | rat24 gr3 S1  | 24 | 3 | Cpu |
| LGP_24-03-1 | Objectif_10 | 0 | 124 | 112976   | 37154,24 | 0,33 | 94528  | rat24 gr3 S1  | 24 | 3 | LGP |
| CCx_24-03-1 | Objectif_10 | 0 | 54  | 141257,1 | 52145,17 | 0,37 | 132668 | rat24 gr3 S1  | 24 | 3 | CCx |
| CF_25-03-1  | Objectif_10 | 0 | 157 | 169526   | 68117,94 | 0,4  | 173306 | rat25 gr3 S1  | 25 | 3 | CF  |
| DG_25-03-1  | Objectif_10 | 0 | 95  | 39174,52 | 16593    | 0,42 | 42216  | rat25 gr3 S1  | 25 | 3 | DG  |
| CPu_25-03-1 | Objectif_10 | 0 | 149 | 157298,3 | 64110,79 | 0,41 | 163111 | rat25 gr3 S1  | 25 | 3 | Cpu |
| LGP_25-03-1 | Objectif_10 | 0 | 150 | 94832,77 | 43520,86 | 0,46 | 110726 | rat25 gr3 S1  | 25 | 3 | LGP |
| CCx_25-03-1 | Objectif_10 | 0 | 89  | 158550,1 | 68687,47 | 0,43 | 174755 | rat25 gr3 S1  | 25 | 3 | CCx |
| CCx_01-04-1 | Objectif_10 | 0 | 135 | 126270,9 | 40249,51 | 0,32 | 102403 | rat1 gr4 S1   | 1  | 4 | CCx |
| CCx_02-04-1 | Objectif_10 | 0 | 149 | 92960,66 | 34874,16 | 0,38 | 88727  | rat2 gr4 S1   | 2  | 4 | CCx |
| CCx_03-04-1 | Objectif_10 | 0 | 110 | 107640,3 | 32836,19 | 0,31 | 83542  | rat3 gr4 S1   | 3  | 4 | CCx |
| CCx_04-04-1 | Objectif_10 | 0 | 119 | 114449,5 | 41671,96 | 0,36 | 106022 | rat4 gr4 S1   | 4  | 4 | CCx |
| CCx_05-04-1 | Objectif_10 | 0 | 104 | 134791,8 | 51285,96 | 0,38 | 130482 | rat5 gr4 S1   | 5  | 4 | CCx |
| CCx_06-04-1 | Objectif_10 | 0 | 100 | 90117,73 | 25083,28 | 0,28 | 63817  | rat6 gr4 S1   | 6  | 4 | CCx |
| CF_02-04-1  | Objectif_10 | 0 | 201 | 163447,5 | 44165,07 | 0,27 | 112365 | rat2 gr4 S1   | 2  | 4 | CF  |
| CF_03-04-1  | Objectif_10 | 0 | 155 | 138269,9 | 15105,7  | 0,11 | 38432  | rat3 gr4 S1   | 3  | 4 | CF  |
| CF_04-04-1  | Objectif_10 | 0 | 146 | 168455,4 | 23208,04 | 0,14 | 59046  | rat4 gr4 S1   | 4  | 4 | CF  |
| CF_05-04-1  | Objectif_10 | 0 | 158 | 152015,7 | 19598,66 | 0,13 | 49863  | rat5 gr4 S1   | 5  | 4 | CF  |
| CF_06-04-1  | Objectif_10 | 0 | 131 | 165444,6 | 12145,64 | 0,07 | 30901  | rat6 gr4 S1   | 6  | 4 | CF  |
| CPu_01-04-1 | Objectif_10 | 0 | 200 | 125017   | 15574,61 | 0,12 | 39625  | rat1 gr4 S1   | 1  | 4 | Cpu |
| CPu_02-04-1 | Objectif_10 | 0 | 200 | 152635,1 | 2800,09  | 0,02 | 7124   | rat2 gr4 S1   | 2  | 4 | Cpu |
| CPu_03-04-1 | Objectif_10 | 0 | 143 | 153985,6 | 17366,13 | 0,11 | 44183  | rat3 gr4 S1   | 3  | 4 | Cpu |
| CPu_04-04-1 | Objectif_10 | 0 | 157 | 137352,1 | 9959,89  | 0,07 | 25340  | rat4 gr4 S1   | 4  | 4 | Cpu |
| Cpu_05-04-1 | Objectif_10 | 0 | 152 | 147173,3 | 12586,25 | 0,09 | 32022  | rat5 gr4 S1   | 5  | 4 | Cpu |
| CPu_06-04-1 | Objectif_10 | 0 | 149 | 165444,6 | 12500,17 | 0,08 | 31803  | rat6 gr4 S1   | 6  | 4 | Cpu |
| DG_01-04-1  | Objectif_10 | 0 | 129 | 28481,2  | 9318,43  | 0,33 | 23708  | rat1 gr4 S1   | 1  | 4 | DG  |
| DG_02-04-1  | Objectif_10 | 0 | 125 | 19349,07 | 9935,91  | 0,51 | 25279  | rat2 gr4 S1   | 2  | 4 | DG  |
| DG_03-04-1  | Objectif_10 | 0 | 100 | 18930,08 | 8419,53  | 0,44 | 21421  | rat3 gr4 S1   | 3  | 4 | DG  |
| DG_04-04-1  | Objectif_10 | 0 | 126 | 25858,37 | 5112,4   | 0,2  | 13007  | rat4 gr4 S1   | 4  | 4 | DG  |
| DG_05-04-1  | Objectif_10 | 0 | 136 | 27303,62 | 7652,29  | 0,28 | 19469  | rat5 gr4 S1   | 5  | 4 | DG  |
| DG_06-04-1  | Objectif_10 | 0 | 116 | 26717,19 | 5621,01  | 0,21 | 14301  | rat6 gr4 S1   | 6  | 4 | DG  |
| FC_01-04-1  | Objectif_10 | 0 | 188 | 166803   | 28285,85 | 0,17 | 71965  | rat1 gr4 S1   | 1  | 4 | FC  |

|             |             |   |     |          |          |      |        |              |    |   |     |
|-------------|-------------|---|-----|----------|----------|------|--------|--------------|----|---|-----|
| LGP_01-04-1 | Objectif_10 | 0 | 176 | 84542,71 | 18702,11 | 0,22 | 47582  | rat1 gr4 S1  | 1  | 4 | LGP |
| LGP_02-04-1 | Objectif_10 | 0 | 207 | 107395,4 | 9432,81  | 0,09 | 23999  | rat2 gr4 S1  | 2  | 4 | LGP |
| LGP_03-04-1 | Objectif_10 | 0 | 111 | 64310,46 | 10596,24 | 0,16 | 26959  | rat3 gr4 S1  | 3  | 4 | LGP |
| LGP_04-04-1 | Objectif_10 | 0 | 141 | 52837,33 | 9646,63  | 0,18 | 24543  | rat4 gr4 S1  | 4  | 4 | LGP |
| LGP_05-04-1 | Objectif_10 | 0 | 131 | 74975,88 | 18029,6  | 0,24 | 45871  | rat5 gr4 S1  | 5  | 4 | LGP |
| LGP_06-04-1 | Objectif_10 | 0 | 138 | 91075,2  | 18120,39 | 0,2  | 46102  | rat6 gr4 S1  | 6  | 4 | LGP |
| CF_07-04-1  | Objectif_10 | 0 | 133 | 165100,3 | 24063,71 | 0,15 | 61223  | rat7 gr4 S1  | 7  | 4 | CF  |
| DG_07-04-1  | Objectif_10 | 0 | 97  | 26388,99 | 8101,55  | 0,31 | 20612  | rat7 gr4 S1  | 7  | 4 | DG  |
| CPu_07-04-1 | Objectif_10 | 0 | 114 | 159230,5 | 13010,35 | 0,08 | 33101  | rat7 gr4 S1  | 7  | 4 | Cpu |
| LGP_07-04-1 | Objectif_10 | 0 | 100 | 80141,34 | 15523,91 | 0,19 | 39496  | rat7 gr4 S1  | 7  | 4 | LGP |
| CCx_07-04-1 | Objectif_10 | 0 | 99  | 164763,1 | 50169,3  | 0,3  | 127641 | rat7 gr4 S1  | 7  | 4 | CCx |
| CF_08-04-1  | Objectif_10 | 0 | 169 | 153083,2 | 16721,92 | 0,11 | 42544  | rat8 gr4S1   | 8  | 4 | CF  |
| DG_08-04-1  | Objectif_10 | 0 | 92  | 26379,16 | 6268,36  | 0,24 | 15948  | rat8 gr4S1   | 8  | 4 | DG  |
| CPu_08-04-1 | Objectif_10 | 0 | 97  | 100919,9 | 8053,99  | 0,08 | 20491  | rat8 gr4S1   | 8  | 4 | Cpu |
| CCx_08-04-1 | Objectif_10 | 0 | 75  | 136158   | 23046,88 | 0,17 | 58636  | rat8 gr4S1   | 8  | 4 | CCx |
| CF_09-04-1  | Objectif_10 | 0 | 123 | 138501,8 | 5235,03  | 0,04 | 13319  | rat9 gr4 S1  | 9  | 4 | CF  |
| DG_09-04-1  | Objectif_10 | 0 | 97  | 25143,41 | 6900,39  | 0,27 | 17556  | rat9 gr4 S1  | 9  | 4 | DG  |
| CPu_09-04-1 | Objectif_10 | 0 | 122 | 136168,3 | 5416,23  | 0,04 | 13780  | rat9 gr4 S1  | 9  | 4 | Cpu |
| LGP_09-04-1 | Objectif_10 | 0 | 112 | 69726,3  | 11162,62 | 0,16 | 28400  | rat9 gr4 S1  | 9  | 4 | LGP |
| CCx_09-04-1 | Objectif_10 | 0 | 72  | 53097,14 | 9407,26  | 0,18 | 23934  | rat9 gr4 S1  | 9  | 4 | CCx |
| CF_10-04-1  | Objectif_10 | 0 | 115 | 134752,1 | 8079,15  | 0,06 | 20555  | rat10 gr4 S1 | 10 | 4 | CF  |
| DG_10-04-1  | Objectif_10 | 0 | 97  | 20220,07 | 3390,84  | 0,17 | 8627   | rat10 gr4 S1 | 10 | 4 | DG  |
| CPu_10-04-1 | Objectif_10 | 0 | 128 | 147014,1 | 22721,83 | 0,15 | 57809  | rat10 gr4 S1 | 10 | 4 | Cpu |
| LGP_10-04-1 | Objectif_10 | 0 | 128 | 64240,5  | 13624,29 | 0,21 | 34663  | rat10 gr4 S1 | 10 | 4 | LGP |
| CCx_10-04-1 | Objectif_10 | 0 | 132 | 28792,49 | 8632,56  | 0,3  | 21963  | rat10 gr4 S1 | 10 | 4 | CCx |
| CF_11-04-1  | Objectif_10 | 0 | 140 | 152273,5 | 15947,22 | 0,1  | 40573  | rat11 gr4 S1 | 11 | 4 | CF  |
| DG_11-04-1  | Objectif_10 | 0 | 92  | 27436,07 | 7341,39  | 0,27 | 18678  | rat11 gr4 S1 | 11 | 4 | DG  |
| CPu_11-04-1 | Objectif_10 | 0 | 134 | 111236,7 | 8443,5   | 0,08 | 21482  | rat11 gr4 S1 | 11 | 4 | Cpu |
| LGP_11-04-1 | Objectif_10 | 0 | 105 | 73599,8  | 12430,6  | 0,17 | 31626  | rat11 gr4 S1 | 11 | 4 | LGP |
| CCx_11-04-1 | Objectif_10 | 0 | 92  | 79992,77 | 30870,94 | 0,39 | 78542  | rat11 gr4 S1 | 11 | 4 | CCx |
| CF_12-04-1  | Objectif_10 | 0 | 182 | 144306,8 | 17431,38 | 0,12 | 44349  | rat12 gr4 S1 | 12 | 4 | CF  |
| DG_12-04-1  | Objectif_10 | 0 | 103 | 30584,41 | 8325,98  | 0,27 | 21183  | rat12 gr4 S1 | 12 | 4 | DG  |
| CPu_12-04-1 | Objectif_10 | 0 | 139 | 134377,5 | 7235,66  | 0,05 | 18409  | rat12 gr4 S1 | 12 | 4 | Cpu |
| LGP_12-04-1 | Objectif_10 | 0 | 116 | 57943,84 | 8331,09  | 0,14 | 21196  | rat12 gr4 S1 | 12 | 4 | LGP |
| CCx_12-04-1 | Objectif_10 | 0 | 114 | 112768,4 | 45520,31 | 0,4  | 115813 | rat12 gr4 S1 | 12 | 4 | CCx |
| CF_13-04-1  | Objectif_10 | 0 | 161 | 125081,1 | 20464,54 | 0,16 | 52066  | rat13 gr4 S1 | 13 | 4 | CF  |
| DG_13-04-1  | Objectif_10 | 0 | 108 | 18340,9  | 4475,66  | 0,24 | 11387  | rat13 gr4 S1 | 13 | 4 | DG  |
| CPu_13-04-1 | Objectif_10 | 0 | 179 | 120794,9 | 9639,55  | 0,08 | 24525  | rat13 gr4 S1 | 13 | 4 | Cpu |
| LGP_13-04-1 | Objectif_10 | 0 | 177 | 85354,76 | 12890,86 | 0,15 | 32797  | rat13 gr4 S1 | 13 | 4 | LGP |
| CCx_13-04-1 | Objectif_10 | 0 | 128 | 120065   | 31994,67 | 0,27 | 81401  | rat13 gr4 S1 | 13 | 4 | CCx |
| CF_14-04-1  | Objectif_10 | 0 | 160 | 149134,2 | 18558,65 | 0,12 | 47217  | rat14 gr4 S1 | 14 | 4 | CF  |
| DG_14-04-1  | Objectif_10 | 0 | 169 | 25463,75 | 8830,66  | 0,35 | 22467  | rat14 gr4 S1 | 14 | 4 | DG  |
| CPu_14-04-1 | Objectif_10 | 0 | 165 | 102254,3 | 6217,27  | 0,06 | 15818  | rat14 gr4 S1 | 14 | 4 | Cpu |
| LGP_14-04-1 | Objectif_10 | 0 | 159 | 66380,27 | 9785,77  | 0,15 | 24897  | rat14 gr4 S1 | 14 | 4 | LGP |
| CCx_14-04-1 | Objectif_10 | 0 | 134 | 104153,9 | 31706,96 | 0,3  | 80669  | rat14 gr4 S1 | 14 | 4 | CCx |
| CF_15-04-1  | Objectif_10 | 0 | 154 | 106896,6 | 20287,67 | 0,19 | 51616  | rat15 gr4 S1 | 15 | 4 | CF  |
| DG_15-04-1  | Objectif_10 | 0 | 123 | 21451,1  | 4967,37  | 0,23 | 12638  | rat15 gr4 S1 | 15 | 4 | DG  |
| CPu_15-04-1 | Objectif_10 | 0 | 149 | 141169   | 9589,24  | 0,07 | 24397  | rat15 gr4 S1 | 15 | 4 | Cpu |
| LGP_15-04-1 | Objectif_10 | 0 | 137 | 62398,66 | 13841,65 | 0,22 | 35216  | rat15 gr4 S1 | 15 | 4 | LGP |
| CCx_15-04-1 | Objectif_10 | 0 | 104 | 143725   | 64032,97 | 0,45 | 162913 | rat15 gr4 S1 | 15 | 4 | CCx |
| CF_17-04-1  | Objectif_10 | 0 | 159 | 160423   | 17557,94 | 0,11 | 44671  | rat17 gr4 S1 | 17 | 4 | CF  |
| DG_17-04-1  | Objectif_10 | 0 | 106 | 29964,57 | 6184,64  | 0,21 | 15735  | rat17 gr4 S1 | 17 | 4 | DG  |
| CPu_17-04-1 | Objectif_10 | 0 | 170 | 130172,7 | 21795,41 | 0,17 | 55452  | rat17 gr4 S1 | 17 | 4 | Cpu |
| LGP_17-04-1 | Objectif_10 | 0 | 149 | 93078,59 | 14682,78 | 0,16 | 37356  | rat17 gr4 S1 | 17 | 4 | LGP |
| CCx_17-04-1 | Objectif_10 | 0 | 128 | 121309   | 34754,67 | 0,29 | 88423  | rat17 gr4 S1 | 17 | 4 | CCx |
| CF_19-04-1  | Objectif_10 | 0 | 157 | 147011,3 | 25194,51 | 0,17 | 64100  | rat19 gr4 S1 | 19 | 4 | CF  |
| DG_19-04-1  | Objectif_10 | 0 | 138 | 28693,05 | 7634,21  | 0,27 | 19423  | rat19 gr4 S1 | 19 | 4 | DG  |
| Cpu_19-04-1 | Objectif_10 | 0 | 168 | 149455,3 | 15273,93 | 0,1  | 38860  | rat19 gr4 S1 | 19 | 4 | Cpu |
| LGP_19-04-1 | Objectif_10 | 0 | 148 | 78453,98 | 13819,64 | 0,18 | 35160  | rat19 gr4 S1 | 19 | 4 | LGP |
| CCx_19-04-1 | Objectif_10 | 0 | 146 | 82876,18 | 26043,89 | 0,31 | 66261  | rat19 gr4 S1 | 19 | 4 | CCx |
| CF_20-04-1  | Objectif_10 | 0 | 144 | 110829,5 | 23592,83 | 0,21 | 60025  | rat20 gr4 S1 | 20 | 4 | CF  |
| DG_20-04-1  | Objectif_10 | 0 | 98  | 27574,43 | 6019,56  | 0,22 | 15315  | rat20 gr4 S1 | 20 | 4 | DG  |
| CPu_20-04-1 | Objectif_10 | 0 | 151 | 100572,1 | 5542,4   | 0,06 | 14101  | rat20 gr4 S1 | 20 | 4 | Cpu |
| LGP_20-04-1 | Objectif_10 | 0 | 147 | 82366,79 | 13699,76 | 0,17 | 34855  | rat20 gr4 S1 | 20 | 4 | LGP |
| CCx_20-04-1 | Objectif_10 | 0 | 94  | 74091,52 | 19347,89 | 0,26 | 49225  | rat20 gr4 S1 | 20 | 4 | CCx |
| CF_21-04-1  | Objectif_10 | 0 | 144 | 131948,5 | 15590,72 | 0,12 | 39666  | rat21 gr4 S1 | 21 | 4 | CF  |
| DG_21-04-1  | Objectif_10 | 0 | 101 | 16955,39 | 4405,7   | 0,26 | 11209  | rat21 gr4 S1 | 21 | 4 | DG  |
| CPu_21-04-1 | Objectif_10 | 0 | 145 | 125154,2 | 15070,72 | 0,12 | 38343  | rat21 gr4 S1 | 21 | 4 | Cpu |

|             |             |   |     |          |          |      |        |       |     |    |    |   |     |
|-------------|-------------|---|-----|----------|----------|------|--------|-------|-----|----|----|---|-----|
| LGP_21-04-1 | Objectif_10 | 0 | 144 | 94368,18 | 13025,29 | 0,14 | 33139  | rat21 | gr4 | S1 | 21 | 4 | LGP |
| CCx_21-04-1 | Objectif_10 | 0 | 127 | 138767,5 | 39392,66 | 0,28 | 100223 | rat21 | gr4 | S1 | 21 | 4 | CCx |
| CF_22-04-1  | Objectif_10 | 0 | 143 | 122469,3 | 13061,45 | 0,11 | 33231  | rat22 | gr4 | S1 | 22 | 4 | CF  |
| DG_22-04-1  | Objectif_10 | 0 | 106 | 22532,38 | 6605,21  | 0,29 | 16805  | rat22 | gr4 | S1 | 22 | 4 | DG  |
| CPu_22-04-1 | Objectif_10 | 0 | 148 | 114643,3 | 14329,43 | 0,12 | 36457  | rat22 | gr4 | S1 | 22 | 4 | Cpu |
| LGP_22-04-1 | Objectif_10 | 0 | 98  | 76461,21 | 10211,44 | 0,13 | 25980  | rat22 | gr4 | S1 | 22 | 4 | LGP |
| CCx_22-04-1 | Objectif_10 | 0 | 89  | 116565,3 | 33310,21 | 0,29 | 84748  | rat22 | gr4 | S1 | 22 | 4 | CCx |
| CF_23-04-1  | Objectif_10 | 0 | 167 | 130537,4 | 12627,91 | 0,1  | 32128  | rat23 | gr4 | S1 | 23 | 4 | CF  |
| DG_23-04-1  | Objectif_10 | 0 | 108 | 27399,52 | 6400,43  | 0,23 | 16284  | rat23 | gr4 | S1 | 23 | 4 | DG  |
| CPu_23-04-1 | Objectif_10 | 0 | 158 | 114026,6 | 4745,69  | 0,04 | 12074  | rat23 | gr4 | S1 | 23 | 4 | Cpu |
| LGP_23-04-1 | Objectif_10 | 0 | 138 | 56438,85 | 7412,92  | 0,13 | 18860  | rat23 | gr4 | S1 | 23 | 4 | LGP |
| CCx_23-04-1 | Objectif_10 | 0 | 98  | 111619,5 | 34230,34 | 0,31 | 87089  | rat23 | gr4 | S1 | 23 | 4 | CCx |
| CF_24-04-1  | Objectif_10 | 0 | 150 | 80905,43 | 10490,11 | 0,13 | 26689  | rat24 | gr4 | S1 | 24 | 4 | CF  |
| DG_24-04-1  | Objectif_10 | 0 | 98  | 23531,12 | 4388,4   | 0,19 | 11165  | rat24 | gr4 | S1 | 24 | 4 | DG  |
| CPu_24-04-1 | Objectif_10 | 0 | 154 | 135888,8 | 7370,87  | 0,05 | 18753  | rat24 | gr4 | S1 | 24 | 4 | Cpu |
| LGP_24-04-1 | Objectif_10 | 0 | 143 | 78640,28 | 11072,22 | 0,14 | 28170  | rat24 | gr4 | S1 | 24 | 4 | LGP |
| CCx_24-04-1 | Objectif_10 | 0 | 113 | 107275,9 | 36813,86 | 0,34 | 93662  | rat24 | gr4 | S1 | 24 | 4 | CCx |
| CF_01-05-1  | Objectif_10 | 0 | 173 | 84305,31 | 18963,49 | 0,22 | 48247  | rat1  | gr5 | S1 | 1  | 5 | CF  |
| DG_01-05-1  | Objectif_10 | 0 | 101 | 18629    | 4997,24  | 0,27 | 12714  | rat1  | gr5 | S1 | 1  | 5 | DG  |
| CPu_01-05-1 | Objectif_10 | 0 | 166 | 51489,95 | 13369,99 | 0,26 | 34016  | rat1  | gr5 | S1 | 1  | 5 | Cpu |
| CCx_01-05-1 | Objectif_10 | 0 | 143 | 50536,81 | 17540,65 | 0,35 | 44627  | rat1  | gr5 | S1 | 1  | 5 | CCx |
| CF_02-05-1  | Objectif_10 | 0 | 132 | 77320,42 | 16886,22 | 0,22 | 42962  | rat2  | gr5 | S1 | 2  | 5 | CF  |
| DG_02-05-1  | Objectif_10 | 0 | 89  | 16118,2  | 4834,52  | 0,3  | 12300  | rat2  | gr5 | S1 | 2  | 5 | DG  |
| Cpu_02-05-1 | Objectif_10 | 0 | 126 | 89612,27 | 12881,04 | 0,14 | 32772  | rat2  | gr5 | S1 | 2  | 5 | Cpu |
| LGP_02-05-1 | Objectif_10 | 0 | 123 | 50496,32 | 8847,95  | 0,18 | 22511  | rat2  | gr5 | S1 | 2  | 5 | LGP |
| CCx_02-05-1 | Objectif_10 | 0 | 72  | 28621,91 | 10250,75 | 0,36 | 26080  | rat2  | gr5 | S1 | 2  | 5 | CCx |
| CF_03-05-1  | Objectif_10 | 0 | 107 | 41116,18 | 9467     | 0,23 | 24086  | rat3  | gr5 | S1 | 3  | 5 | CF  |
| Cpu_03-05-1 | Objectif_10 | 0 | 136 | 49372,2  | 6225,13  | 0,13 | 15838  | rat3  | gr5 | S1 | 3  | 5 | Cpu |
| LGP_03-05-1 | Objectif_10 | 0 | 136 | 54279,82 | 12136,21 | 0,22 | 30877  | rat3  | gr5 | S1 | 3  | 5 | LGP |
| CCx_03-05-1 | Objectif_10 | 0 | 95  | 44412,7  | 19031,48 | 0,43 | 48420  | rat3  | gr5 | S1 | 3  | 5 | CCx |
| CF_04-05-1  | Objectif_10 | 0 | 200 | 27643,21 | 1128,84  | 0,04 | 2872   | rat4  | gr5 | S1 | 4  | 5 | CF  |
| DG_04-05-1  | Objectif_10 | 0 | 157 | 23468,63 | 5305,39  | 0,23 | 13498  | rat4  | gr5 | S1 | 4  | 5 | DG  |
| CPu_04-05-1 | Objectif_10 | 0 | 174 | 42529,2  | 2050,94  | 0,05 | 5218   | rat4  | gr5 | S1 | 4  | 5 | Cpu |
| LGP_04-05-1 | Objectif_10 | 0 | 106 | 47102,34 | 8577,53  | 0,18 | 21823  | rat4  | gr5 | S1 | 4  | 5 | LGP |
| CCx_04-05-1 | Objectif_10 | 0 | 132 | 30463,74 | 989,7    | 0,03 | 2518   | rat4  | gr5 | S1 | 4  | 5 | CCx |
| CF_05-05-1  | Objectif_10 | 0 | 117 | 71301,25 | 7800,08  | 0,11 | 19845  | rat5  | gr5 | S1 | 5  | 5 | CF  |
| DG_05-05-1  | Objectif_10 | 0 | 75  | 20999,09 | 6987,25  | 0,33 | 17777  | rat5  | gr5 | S1 | 5  | 5 | DG  |
| CPu_05-05-1 | Objectif_10 | 0 | 113 | 91849,91 | 18581,84 | 0,2  | 47276  | rat5  | gr5 | S1 | 5  | 5 | Cpu |
| LGP_05-05-1 | Objectif_10 | 0 | 108 | 40903,15 | 4619,13  | 0,11 | 11752  | rat5  | gr5 | S1 | 5  | 5 | LGP |
| CCx_05-05-1 | Objectif_10 | 0 | 124 | 46707,71 | 7444,37  | 0,16 | 18940  | rat5  | gr5 | S1 | 5  | 5 | CCx |
| CF_06-05-1  | Objectif_10 | 0 | 133 | 94868,92 | 10059,72 | 0,11 | 25594  | rat6  | gr5 | S1 | 6  | 5 | CF  |
| DG_06-05-1  | Objectif_10 | 0 | 96  | 14972,06 | 3380,23  | 0,23 | 8600   | rat6  | gr5 | S1 | 6  | 5 | DG  |
| Cpu_06-05-1 | Objectif_10 | 0 | 141 | 72270,12 | 7132,29  | 0,1  | 18146  | rat6  | gr5 | S1 | 6  | 5 | Cpu |
| LGP_06-05-1 | Objectif_10 | 0 | 114 | 87078,67 | 17658,17 | 0,2  | 44926  | rat6  | gr5 | S1 | 6  | 5 | LGP |
| CCx_06-05-1 | Objectif_10 | 0 | 91  | 45435,41 | 14336,89 | 0,32 | 36476  | rat6  | gr5 | S1 | 6  | 5 | CCx |
| CF_07-05-1  | Objectif_10 | 0 | 141 | 67288,21 | 8531,55  | 0,13 | 21706  | rat7  | gr5 | S1 | 7  | 5 | CF  |
| DG_07-05-1  | Objectif_10 | 0 | 89  | 15344,67 | 4274,03  | 0,28 | 10874  | rat7  | gr5 | S1 | 7  | 5 | DG  |
| CPu_07-05-1 | Objectif_10 | 0 | 138 | 68753,5  | 5406,8   | 0,08 | 13756  | rat7  | gr5 | S1 | 7  | 5 | Cpu |
| LGP_07-05-1 | Objectif_10 | 0 | 117 | 68972,03 | 12384,22 | 0,18 | 31508  | rat7  | gr5 | S1 | 7  | 5 | LGP |
| CCx_07-05-1 | Objectif_10 | 0 | 106 | 62031,16 | 22589,77 | 0,36 | 57473  | rat7  | gr5 | S1 | 7  | 5 | CCx |
| CF_08-05-1  | Objectif_10 | 0 | 129 | 84295,09 | 13340,51 | 0,16 | 33941  | rat8  | gr5 | S1 | 8  | 5 | CF  |
| DG_08-05-1  | Objectif_10 | 0 | 86  | 17501,34 | 4073,57  | 0,23 | 10364  | rat8  | gr5 | S1 | 8  | 5 | DG  |
| CPu_08-05-1 | Objectif_10 | 0 | 123 | 133475,9 | 17084,71 | 0,13 | 43467  | rat8  | gr5 | S1 | 8  | 5 | Cpu |
| LGP_08-05-1 | Objectif_10 | 0 | 120 | 32202,59 | 8581,07  | 0,27 | 21832  | rat8  | gr5 | S1 | 8  | 5 | LGP |
| CCx_08-05-1 | Objectif_10 | 0 | 25  | 30412,25 | 4425,74  | 0,15 | 11260  | rat8  | gr5 | S1 | 8  | 5 | CCx |
| CF_09-05-1  | Objectif_10 | 0 | 129 | 110553,2 | 21030,93 | 0,19 | 53507  | rat9  | gr5 | S1 | 9  | 5 | CF  |
| DG_09-05-1  | Objectif_10 | 0 | 58  | 18288,23 | 4755,12  | 0,26 | 12098  | rat9  | gr5 | S1 | 9  | 5 | DG  |
| CPu_09-05-1 | Objectif_10 | 0 | 145 | 66831,48 | 5724,38  | 0,09 | 14564  | rat9  | gr5 | S1 | 9  | 5 | Cpu |
| CCx_09-05-1 | Objectif_10 | 0 | 86  | 81343,68 | 33630,15 | 0,41 | 85562  | rat9  | gr5 | S1 | 9  | 5 | CCx |
| CF_10-05-1  | Objectif_10 | 0 | 115 | 111827,5 | 13542,15 | 0,12 | 34454  | rat10 | gr5 | S1 | 10 | 5 | CF  |
| DG_10-05-1  | Objectif_10 | 0 | 84  | 26539,92 | 8082,29  | 0,3  | 20563  | rat10 | gr5 | S1 | 10 | 5 | DG  |
| CPu_10-05-1 | Objectif_10 | 0 | 139 | 101452,9 | 16671,22 | 0,16 | 42415  | rat10 | gr5 | S1 | 10 | 5 | Cpu |
| LGP_10-05-1 | Objectif_10 | 0 | 93  | 64864,27 | 17931,34 | 0,28 | 45621  | rat10 | gr5 | S1 | 10 | 5 | LGP |
| CCx_10-05-1 | Objectif_10 | 0 | 92  | 118897,3 | 40557,66 | 0,34 | 103187 | rat10 | gr5 | S1 | 10 | 5 | CCx |
| CF_11-05-1  | Objectif_10 | 0 | 179 | 72240,25 | 10097,85 | 0,14 | 25691  | rat11 | gr5 | S1 | 11 | 5 | CF  |
| DG_11-05-1  | Objectif_10 | 0 | 107 | 16854,77 | 4948,5   | 0,29 | 12590  | rat11 | gr5 | S1 | 11 | 5 | DG  |
| CPu_11-05-1 | Objectif_10 | 0 | 160 | 43507,11 | 5109,65  | 0,12 | 13000  | rat11 | gr5 | S1 | 11 | 5 | Cpu |
| LGP_11-05-1 | Objectif_10 | 0 | 128 | 61940,37 | 13588,92 | 0,22 | 34573  | rat11 | gr5 | S1 | 11 | 5 | LGP |

|             |             |   |     |          |          |      |       |       |     |    |    |   |     |
|-------------|-------------|---|-----|----------|----------|------|-------|-------|-----|----|----|---|-----|
| CCx_11-05-1 | Objectif_10 | 0 | 127 | 46662,51 | 17797,31 | 0,38 | 45280 | rat11 | gr5 | S1 | 11 | 5 | CCx |
| CF_12-05-1  | Objectif_10 | 0 | 149 | 106718,6 | 15145,4  | 0,14 | 38533 | rat12 | gr5 | S1 | 12 | 5 | CF  |
| DG_12-05-1  | Objectif_10 | 0 | 114 | 25722,77 | 6479,82  | 0,25 | 16486 | rat12 | gr5 | S1 | 12 | 5 | DG  |
| CPu_12-05-1 | Objectif_10 | 0 | 172 | 40966,04 | 4077,5   | 0,1  | 10374 | rat12 | gr5 | S1 | 12 | 5 | Cpu |
| LGP_12-05-1 | Objectif_10 | 0 | 121 | 47504,82 | 9008,31  | 0,19 | 22919 | rat12 | gr5 | S1 | 12 | 5 | LGP |
| CCx_12-05-1 | Objectif_10 | 0 | 152 | 67660,03 | 14229,2  | 0,21 | 36202 | rat12 | gr5 | S1 | 12 | 5 | CCx |
| CF_13-05-1  | Objectif_10 | 0 | 123 | 91351,13 | 14028,74 | 0,15 | 35692 | rat13 | gr5 | S1 | 13 | 5 | CF  |
| DG_13-05-1  | Objectif_10 | 0 | 88  | 13295,71 | 3720,22  | 0,28 | 9465  | rat13 | gr5 | S1 | 13 | 5 | DG  |
| CPu_13-05-1 | Objectif_10 | 0 | 141 | 84136,3  | 10088,02 | 0,12 | 25666 | rat13 | gr5 | S1 | 13 | 5 | Cpu |
| LGP_13-05-1 | Objectif_10 | 0 | 129 | 75557,59 | 12535,94 | 0,17 | 31894 | rat13 | gr5 | S1 | 13 | 5 | LGP |
| CCx_13-05-1 | Objectif_10 | 0 | 88  | 71290,64 | 22789,44 | 0,32 | 57981 | rat13 | gr5 | S1 | 13 | 5 | CCx |
| CF_14-05-1  | Objectif_10 | 0 | 176 | 65445,98 | 6461,35  | 0,1  | 16439 | rat14 | gr5 | S1 | 14 | 5 | CF  |
| DG_14-05-1  | Objectif_10 | 0 | 103 | 20765,23 | 5314,43  | 0,26 | 13521 | rat14 | gr5 | S1 | 14 | 5 | DG  |
| CPu_14-05-1 | Objectif_10 | 0 | 151 | 26405,5  | 1239,68  | 0,05 | 3154  | rat14 | gr5 | S1 | 14 | 5 | Cpu |
| LGP_14-05-1 | Objectif_10 | 0 | 141 | 36265,95 | 3270,57  | 0,09 | 8321  | rat14 | gr5 | S1 | 14 | 5 | LGP |
| CCx_14-05-1 | Objectif_10 | 0 | 119 | 67236,72 | 20506,6  | 0,3  | 52173 | rat14 | gr5 | S1 | 14 | 5 | CCx |
| CF_15-05-1  | Objectif_10 | 0 | 151 | 64502,66 | 5048,34  | 0,08 | 12844 | rat15 | gr5 | S1 | 15 | 5 | CF  |
| DG_15-05-1  | Objectif_10 | 0 | 142 | 10367,48 | 3080,73  | 0,3  | 7838  | rat15 | gr5 | S1 | 15 | 5 | DG  |
| CPu_15-05-1 | Objectif_10 | 0 | 160 | 33814,88 | 2217,98  | 0,07 | 5643  | rat15 | gr5 | S1 | 15 | 5 | Cpu |
| LGP_15-05-1 | Objectif_10 | 0 | 144 | 56453,39 | 9339,26  | 0,17 | 23761 | rat15 | gr5 | S1 | 15 | 5 | LGP |
| CCx_15-05-1 | Objectif_10 | 0 | 114 | 45079,3  | 9695,37  | 0,22 | 24667 | rat15 | gr5 | S1 | 15 | 5 | CCx |
| CF_16-05-1  | Objectif_10 | 0 | 139 | 131069,2 | 18615,64 | 0,14 | 47362 | rat16 | gr5 | S1 | 16 | 5 | CF  |
| DG_16-05-1  | Objectif_10 | 0 | 112 | 20158,75 | 5227,57  | 0,26 | 13300 | rat16 | gr5 | S1 | 16 | 5 | DG  |
| CCx_16-05-1 | Objectif_10 | 0 | 84  | 62044,13 | 18471    | 0,3  | 46994 | rat16 | gr5 | S1 | 16 | 5 | CCx |
| CF_17-05-1  | Objectif_10 | 0 | 189 | 94791,1  | 19639,14 | 0,21 | 49966 | rat17 | gr5 | S1 | 17 | 5 | CF  |
| DG_17-05-1  | Objectif_10 | 0 | 145 | 14386,03 | 3776,43  | 0,26 | 9608  | rat17 | gr5 | S1 | 17 | 5 | DG  |
| CPu_17-05-1 | Objectif_10 | 0 | 183 | 64654,77 | 11359,93 | 0,18 | 28902 | rat17 | gr5 | S1 | 17 | 5 | Cpu |
| LGP_17-05-1 | Objectif_10 | 0 | 137 | 66734,8  | 13876,24 | 0,21 | 35304 | rat17 | gr5 | S1 | 17 | 5 | LGP |
| CCx_17-05-1 | Objectif_10 | 0 | 114 | 73264,93 | 21618,15 | 0,3  | 55001 | rat17 | gr5 | S1 | 17 | 5 | CCx |
| CF_18-05-1  | Objectif_10 | 0 | 133 | 125557,5 | 19590,4  | 0,16 | 49842 | rat18 | gr5 | S1 | 18 | 5 | CF  |
| DG_18-05-1  | Objectif_10 | 0 | 107 | 34882,02 | 8048,49  | 0,23 | 20477 | rat18 | gr5 | S1 | 18 | 5 | DG  |
| CPu_18-05-1 | Objectif_10 | 0 | 151 | 103117,1 | 12662,11 | 0,12 | 32215 | rat18 | gr5 | S1 | 18 | 5 | Cpu |
| LGP_18-05-1 | Objectif_10 | 0 | 110 | 58352,61 | 12047,38 | 0,21 | 30651 | rat18 | gr5 | S1 | 18 | 5 | LGP |
| CCx_18-05-1 | Objectif_10 | 0 | 89  | 73861,97 | 27230,12 | 0,37 | 69279 | rat18 | gr5 | S1 | 18 | 5 | CCx |
| CF_19-05-1  | Objectif_10 | 0 | 167 | 122199,7 | 23213,54 | 0,19 | 59060 | rat19 | gr5 | S1 | 19 | 5 | CF  |
| DG_19-05-1  | Objectif_10 | 0 | 109 | 24140,35 | 4891,9   | 0,2  | 12446 | rat19 | gr5 | S1 | 19 | 5 | DG  |
| CPu_19-05-1 | Objectif_10 | 0 | 140 | 58974,02 | 5231,5   | 0,09 | 13310 | rat19 | gr5 | S1 | 19 | 5 | Cpu |
| LGP_19-05-1 | Objectif_10 | 0 | 125 | 38905,67 | 9819,18  | 0,25 | 24982 | rat19 | gr5 | S1 | 19 | 5 | LGP |
| CCx_19-05-1 | Objectif_10 | 0 | 138 | 62203,32 | 26081,63 | 0,42 | 66357 | rat19 | gr5 | S1 | 19 | 5 | CCx |
