# Supplementary material for: Repeated exposure to nanosecond high power pulsed microwaves increases cancer incidence in rat
Source: PubMed Central journal article supplement (PMC7141660; doi:10.1371/journal.pone.0226858), 2020-04-08
Supplement: pone.0226858.s005.pdf [file pone.0226858.s005.pdf]

| Nom de l'image | Calibration | DO min | DO max | Surface  | Surface marquée | Ratio | Nombre |
|----------------|-------------|--------|--------|----------|-----------------|-------|--------|
| CF_E1-2        | Objectif_10 | 0      | 107    | 143052,1 | 56232,1         | 0,39  | 143066 |
| DG_E1-2        | Objectif_10 | 0      | 73     | 19776,31 | 6421,26         | 0,32  | 16337  |
| CPu_E1-2       | Objectif_10 | 0      | 91     | 103113,5 | 29795,55        | 0,29  | 75806  |
| LGP_E1-2       | Objectif_10 | 0      | 72     | 77320,42 | 29191,04        | 0,38  | 74268  |
| CCx_E1-2       | Objectif_10 | 0      | 61     | 38178,53 | 14825,46        | 0,39  | 37719  |
| CF_E2-2        | Objectif_10 | 0      | 97     | 123131,2 | 37734,38        | 0,31  | 96004  |
| DG_E2-2        | Objectif_10 | 0      | 65     | 24254,33 | 8155,4          | 0,34  | 20749  |
| CPu_E2-2       | Objectif_10 | 0      | 87     | 74360,75 | 21551,72        | 0,29  | 54832  |
| LGP_E2-2       | Objectif_10 | 0      | 68     | 65133,9  | 18718,22        | 0,29  | 47623  |
| CCx_E2-2       | Objectif_10 | 0      | 54     | 49859,19 | 15462,2         | 0,31  | 39339  |
| CF_E3-2        | Objectif_10 | 0      | 76     | 105068,6 | 17223,85        | 0,16  | 43821  |
| DG_E3-2        | Objectif_10 | 0      | 53     | 21344,19 | 6364,27         | 0,3   | 16192  |
| CPu_E3-2       | Objectif_10 | 0      | 75     | 88466,14 | 21101,68        | 0,24  | 53687  |
| LGP_E3-2       | Objectif_10 | 0      | 55     | 42153,84 | 12867,28        | 0,31  | 32737  |
| CCx_E3-2       | Objectif_10 | 0      | 47     | 58616,74 | 17955,71        | 0,31  | 45683  |
| DG_E4-2        | Objectif_10 | 0      | 62     | 19939,43 | 4993,7          | 0,25  | 12705  |
| CPu_E4-2       | Objectif_10 | 0      | 83     | 67072,82 | 18000,51        | 0,27  | 45797  |
| LGP_E4-2       | Objectif_10 | 0      | 55     | 55054,52 | 15569,89        | 0,28  | 39613  |
| CF_E5-2        | Objectif_10 | 0      | 81     | 119897,2 | 26710,9         | 0,22  | 67958  |
| DG_E5-2        | Objectif_10 | 0      | 48     | 19989,74 | 4639,96         | 0,23  | 11805  |
| CPu_E5-2       | Objectif_10 | 0      | 74     | 85160,98 | 15512,11        | 0,18  | 39466  |
| LGP_E5-2       | Objectif_10 | 0      | 64     | 42515,05 | 15294,76        | 0,36  | 38913  |
| CCx_E5-2       | Objectif_10 | 0      | 46     | 71684,08 | 22407,39        | 0,31  | 57009  |
| CF_E6-2        | Objectif_10 | 0      | 82     | 118336   | 22644,4         | 0,19  | 57612  |
| DG_E6-2        | Objectif_10 | 0      | 57     | 10266,86 | 6286,44         | 0,61  | 15994  |
| CPu_E6-2       | Objectif_10 | 0      | 76     | 83520    | 17444,35        | 0,21  | 44382  |
| LGP_E6-2       | Objectif_10 | 0      | 55     | 59685,44 | 18190,36        | 0,3   | 46280  |
| CCx_E6-2       | Objectif_10 | 0      | 61     | 55842,2  | 18065,76        | 0,32  | 45963  |
| CF_E7-2        | Objectif_10 | 0      | 74     | 136454   | 33562,94        | 0,25  | 85391  |
| DG_E7-2        | Objectif_10 | 0      | 52     | 21787,16 | 7261,99         | 0,33  | 18476  |
| CPu_E7-2       | Objectif_10 | 0      | 72     | 127887,1 | 33592,81        | 0,26  | 85467  |
| LGP_E7-2       | Objectif_10 | 0      | 57     | 55144,93 | 16409,05        | 0,3   | 41748  |
| CCx_E7-2       | Objectif_10 | 0      | 47     | 35874,47 | 12883           | 0,36  | 32777  |
| CF_E8-2        | Objectif_10 | 0      | 76     | 114300,1 | 26813,88        | 0,23  | 68220  |
| DG_E8-2        | Objectif_10 | 0      | 62     | 32004,89 | 10865,48        | 0,34  | 27644  |
| CPu_E8-2       | Objectif_10 | 0      | 85     | 103738,9 | 27125,56        | 0,26  | 69013  |
| LGP_E8-2       | Objectif_10 | 0      | 83     | 27322,48 | 9582,95         | 0,35  | 24381  |
| CCx_E8-2       | Objectif_10 | 0      | 60     | 49180,39 | 20993,98        | 0,43  | 53413  |
| CF_E9-2        | Objectif_10 | 0      | 78     | 163681,4 | 46799,29        | 0,29  | 119067 |
| DG_E9-2        | Objectif_10 | 0      | 68     | 17123,23 | 4690,66         | 0,27  | 11934  |
| CPu_E9-2       | Objectif_10 | 0      | 81     | 142009,4 | 34090,8         | 0,24  | 86734  |
| LGP_E9-2       | Objectif_10 | 0      | 64     | 57280,37 | 18947,37        | 0,33  | 48206  |
| CCx_E9-2       | Objectif_10 | 0      | 46     | 110648,3 | 32661,68        | 0,3   | 83098  |
| CF_E10-2       | Objectif_10 | 0      | 62     | 147401,6 | 54392,23        | 0,37  | 138385 |
| DG_E10-2       | Objectif_10 | 0      | 50     | 16853,99 | 3154,62         | 0,19  | 8026   |
| CPu_E10-2      | Objectif_10 | 0      | 54     | 109276,6 | 21886,21        | 0,2   | 55683  |
| LGP_E10-2      | Objectif_10 | 0      | 47     | 51847,23 | 18351,12        | 0,35  | 46689  |
| CCx_E10-2      | Objectif_10 | 0      | 45     | 48788,91 | 21281,7         | 0,44  | 54145  |
| CF_E11-2       | Objectif_10 | 0      | 55     | 111425,4 | 25166,6         | 0,23  | 64029  |
| DG_E11-2       | Objectif_10 | 0      | 40     | 16526,97 | 3684,45         | 0,22  | 9374   |
| CPu_E11-2      | Objectif_10 | 0      | 64     | 131205,6 | 55657,86        | 0,42  | 141605 |
| LGP_E11-2      | Objectif_10 | 0      | 62     | 45644,91 | 18200,97        | 0,4   | 46307  |
| CCx_E11-2      | Objectif_10 | 0      | 51     | 45455,06 | 18036,68        | 0,4   | 45889  |
| CF_E12-2       | Objectif_10 | 0      | 67     | 152094,3 | 38491,39        | 0,25  | 97930  |

|           |             |   |    |          |          |      |       |
|-----------|-------------|---|----|----------|----------|------|-------|
| DG_E12-2  | Objectif_10 | 0 | 42 | 25111,97 | 8424,64  | 0,34 | 21434 |
| CPu_E12-2 | Objectif_10 | 0 | 70 | 92222,13 | 24178,08 | 0,26 | 61514 |
| LGP_E12-2 | Objectif_10 | 0 | 62 | 54598,59 | 16396,87 | 0,3  | 41717 |
| CCx_E12-2 | Objectif_10 | 0 | 72 | 62118,42 | 16499,85 | 0,27 | 41979 |
| CF_S1-2   | Objectif_10 | 0 | 49 | 113329,3 | 18508,34 | 0,16 | 47089 |
| DG_S1-2   | Objectif_10 | 0 | 42 | 17798,88 | 3030,81  | 0,17 | 7711  |
| CPu_S1-2  | Objectif_10 | 0 | 43 | 123207   | 13734,74 | 0,11 | 34944 |
| LGP_S1-2  | Objectif_10 | 0 | 48 | 57265,82 | 12066,24 | 0,21 | 30699 |
| CF_S2-2   | Objectif_10 | 0 | 53 | 102350,2 | 19095,16 | 0,19 | 48582 |
| CPu_S2-2  | Objectif_10 | 0 | 58 | 103334   | 16506,14 | 0,16 | 41995 |
| LGP_S2-2  | Objectif_10 | 0 | 40 | 33255,97 | 6999,83  | 0,21 | 17809 |
| CCx_S2-2  | Objectif_10 | 0 | 34 | 53221,73 | 6624,07  | 0,12 | 16853 |
| CF_S3-2   | Objectif_10 | 0 | 49 | 79540,37 | 12779,63 | 0,16 | 32514 |
| DG_S3-2   | Objectif_10 | 0 | 39 | 27339,78 | 2749,78  | 0,1  | 6996  |
| CPu_S3-2  | Objectif_10 | 0 | 48 | 58097,52 | 5660,31  | 0,1  | 14401 |
| LGP_S3-2  | Objectif_10 | 0 | 47 | 36589,82 | 6712,12  | 0,18 | 17077 |
| CCx_S3-2  | Objectif_10 | 0 | 24 | 54404,81 | 7023,41  | 0,13 | 17869 |
| CF_S4-2   | Objectif_10 | 0 | 47 | 109707,7 | 6999,04  | 0,06 | 17807 |
| DG_S4-2   | Objectif_10 | 0 | 38 | 20518,39 | 4154,54  | 0,2  | 10570 |
| CPu_S4-2  | Objectif_10 | 0 | 55 | 76303,2  | 6732,95  | 0,09 | 17130 |
| LGP_S4-2  | Objectif_10 | 0 | 38 | 52533,5  | 5293,99  | 0,1  | 13469 |
| CCx_S4-2  | Objectif_10 | 0 | 30 | 42605,45 | 5720,06  | 0,13 | 14553 |
| CF_S5-2   | Objectif_10 | 0 | 59 | 107513,7 | 7097,31  | 0,07 | 18057 |
| DG_S5-2   | Objectif_10 | 0 | 42 | 21646,84 | 3890,8   | 0,18 | 9899  |
| CPu_S5-2  | Objectif_10 | 0 | 54 | 90240,76 | 12900,3  | 0,14 | 32821 |
| LGP_S5-2  | Objectif_10 | 0 | 42 | 31884,22 | 5430,38  | 0,17 | 13816 |
| CCx_S5-2  | Objectif_10 | 0 | 34 | 30332,07 | 3189,6   | 0,11 | 8115  |
| DG_S6-2   | Objectif_10 | 0 | 36 | 19495,28 | 1829,65  | 0,09 | 4655  |
| CPu_S6-2  | Objectif_10 | 0 | 57 | 96726,48 | 11842,99 | 0,12 | 30131 |
| LGP_S6-2  | Objectif_10 | 0 | 42 | 39971,23 | 8419,92  | 0,21 | 21422 |
| CCx_S6-2  | Objectif_10 | 0 | 38 | 36666,07 | 5424,09  | 0,15 | 13800 |
| DG_S7-2   | Objectif_10 | 0 | 47 | 23833,77 | 3855,43  | 0,16 | 9809  |
| CPu_S7-2  | Objectif_10 | 0 | 56 | 99861,84 | 8370,79  | 0,08 | 21297 |
| LGP_S7-2  | Objectif_10 | 0 | 39 | 55496,71 | 10052,65 | 0,18 | 25576 |
| CF_S8-2   | Objectif_10 | 0 | 83 | 66996,17 | 6032,53  | 0,09 | 15348 |
| DG_S8-2   | Objectif_10 | 0 | 43 | 30155,2  | 3961,95  | 0,13 | 10080 |
| CPu_S8-2  | Objectif_10 | 0 | 63 | 118383,5 | 13641,59 | 0,12 | 34707 |
| LGP_S8-2  | Objectif_10 | 0 | 54 | 37516,24 | 7420     | 0,2  | 18878 |
| CCx_S8-2  | Objectif_10 | 0 | 41 | 43632,49 | 7536,34  | 0,17 | 19174 |
| CF_S9-2   | Objectif_10 | 0 | 76 | 117739,7 | 11158,3  | 0,09 | 28389 |
| DG_S9-2   | Objectif_10 | 0 | 46 | 20302,61 | 3185,67  | 0,16 | 8105  |
| CPu_S9-2  | Objectif_10 | 0 | 81 | 55504,18 | 13153,03 | 0,24 | 33464 |
| LGP_S9-2  | Objectif_10 | 0 | 57 | 49532,17 | 7506,86  | 0,15 | 19099 |
| CF_S10-2  | Objectif_10 | 0 | 68 | 88692,14 | 9241,39  | 0,1  | 23512 |
| DG_S10-2  | Objectif_10 | 0 | 47 | 15056,57 | 1936,56  | 0,13 | 4927  |
| CPu_S10-2 | Objectif_10 | 0 | 58 | 86445,86 | 4253,98  | 0,05 | 10823 |
| LGP_S10-2 | Objectif_10 | 0 | 45 | 32101,97 | 5727,53  | 0,18 | 14572 |
| CCx_S10-2 | Objectif_10 | 0 | 61 | 55425,56 | 8832,62  | 0,16 | 22472 |
| CF_S11-2  | Objectif_10 | 0 | 72 | 74758,91 | 6705,04  | 0,09 | 17059 |
| DG_S11-2  | Objectif_10 | 0 | 50 | 16940,85 | 2461,67  | 0,15 | 6263  |
| CPu_S11-2 | Objectif_10 | 0 | 64 | 50932,21 | 3766,21  | 0,07 | 9582  |
| LGP_S11-2 | Objectif_10 | 0 | 49 | 43997,24 | 8314,98  | 0,19 | 21155 |
| CCx_S11-2 | Objectif_10 | 0 | 55 | 30372,55 | 6758,5   | 0,22 | 17195 |
| DG_S12-2  | Objectif_10 | 0 | 93 | 24806,57 | 3580,69  | 0,14 | 9110  |
| CPu_S12-2 | Objectif_10 | 0 | 96 | 123949,5 | 15595,05 | 0,13 | 39677 |
| LGP_S12-2 | Objectif_10 | 0 | 79 | 63740,93 | 13762,26 | 0,22 | 35014 |

|           |             |   |    |         |         |      |       |
|-----------|-------------|---|----|---------|---------|------|-------|
| CCx_S12-2 | Objectif_10 | 0 | 83 | 26139,4 | 5914,23 | 0,23 | 15047 |
|-----------|-------------|---|----|---------|---------|------|-------|
