# Supplementary material for: Repeated exposure to nanosecond high power pulsed microwaves increases cancer incidence in rat
Source: PubMed Central journal article supplement (PMC7141660; doi:10.1371/journal.pone.0226858), 2020-04-08
Supplement: pone.0226858.s006.pdf [file pone.0226858.s006.pdf]

|                             | Benine       |      | Malignant |      | Benine |      | Malignant |      |
|-----------------------------|--------------|------|-----------|------|--------|------|-----------|------|
|                             | Number/Total |      |           |      | %      |      |           |      |
|                             | Ex           | Sham | Ex        | Sh   | Ex     | Sham | Ex        | Sham |
| brain                       | 1/24         | -    | -         | -    | 4      | -    |           |      |
| pituitary                   | 5/24         | 4/23 | 1/24      | -    | 21     | 17   | 4         | -    |
| thyroid/<br>parathyroid     | -            | -    | -         | -    |        |      |           |      |
| trachea/<br>pharynx         | -            | -    | -         | -    |        |      |           |      |
| lung                        | -            | -    | -         | -    |        |      |           |      |
| heart                       | -            | -    | -         | -    |        |      |           |      |
| intestine                   | -            | -    | 1/12      | 1/23 |        |      | 8         | 4    |
| lever                       | -            | -    | -         | 2/23 |        |      | -         | 9    |
| pancreas                    | 1/6          | 3/23 | 1/24      | -    | 17     | 13   | 4         | -    |
| spleen                      | -            | -    | -         | -    |        |      |           |      |
| Lymph node/<br>thymus/blood | -            | -    | 1/6       | -    |        |      | 17        | -    |
| adrenals                    | 5/24         | 5/23 | 1/12      | -    | 21     | 22   | 8         | -    |
| kidney                      | -            | -    | 1/24      | -    |        |      | 4         | -    |
| bladder                     | -            | -    | -         | -    |        |      |           |      |
| testes                      | 1/24         | -    | -         | -    | 4      | -    |           |      |
| prostata                    | -            | -    | -         | -    |        |      |           |      |
| preputial glands            | -            | -    | -         | 1/23 |        |      | -         | 4    |
| bone                        | -            | 1/23 | 1/24      | -    | -      | 4    | 4         | -    |
| eyes/ears                   | 1/24         | -    | -         | -    | 4      | -    |           |      |
| skin/sub-cutaneous          | 3/8          | 6/23 | 1/8       | 3/23 | 38     | 26   | 13        | 13   |
| breast                      | 1/12         | -    | 1/24      | -    | 8      | -    | 4         | -    |
